# Supplementary material for: Hydrogen- and noble metal-free conversion of nitro aromatics to amino aromatics having reducible groups over an organically modified TiO2 photocatalyst under visible light irradiation
Source: Royal Society of Chemistry journal article supplement (doi:10.1039/c8cy02135j), 2019-01-01
Supplement: c8cy02135j1.pdf [file c8cy02135j1.pdf]

## Electronic Supplementary Information

### **Hydrogen- and noble metal-free conversion of nitro aromatics to amino aromatics having reducible groups over an organically modified TiO<sub>2</sub> photocatalyst under visible light irradiation**

Yuhei Yamamoto,<sup>a</sup> Makoto Fukui,<sup>a</sup> Atsuhiko Tanaka,<sup>b</sup> Keiji Hashimoto<sup>b</sup> and Hiroshi Kominami<sup>b\*</sup>

<sup>a</sup> *Molecular and Material Engineering, Interdisciplinary Graduate School of Science and Engineering, Kindai University, 3-4-1 Kowakae, Higashiosaka, Osaka 577-8502, Japan.*

<sup>b</sup> *Department of Applied Chemistry, Faculty of Science and Engineering, Kindai University, 3-4-1 Kowakae, Higashiosaka, Osaka 577-8502, Japan.*

*E-mail: hiro@apch.kindai.ac.jp*

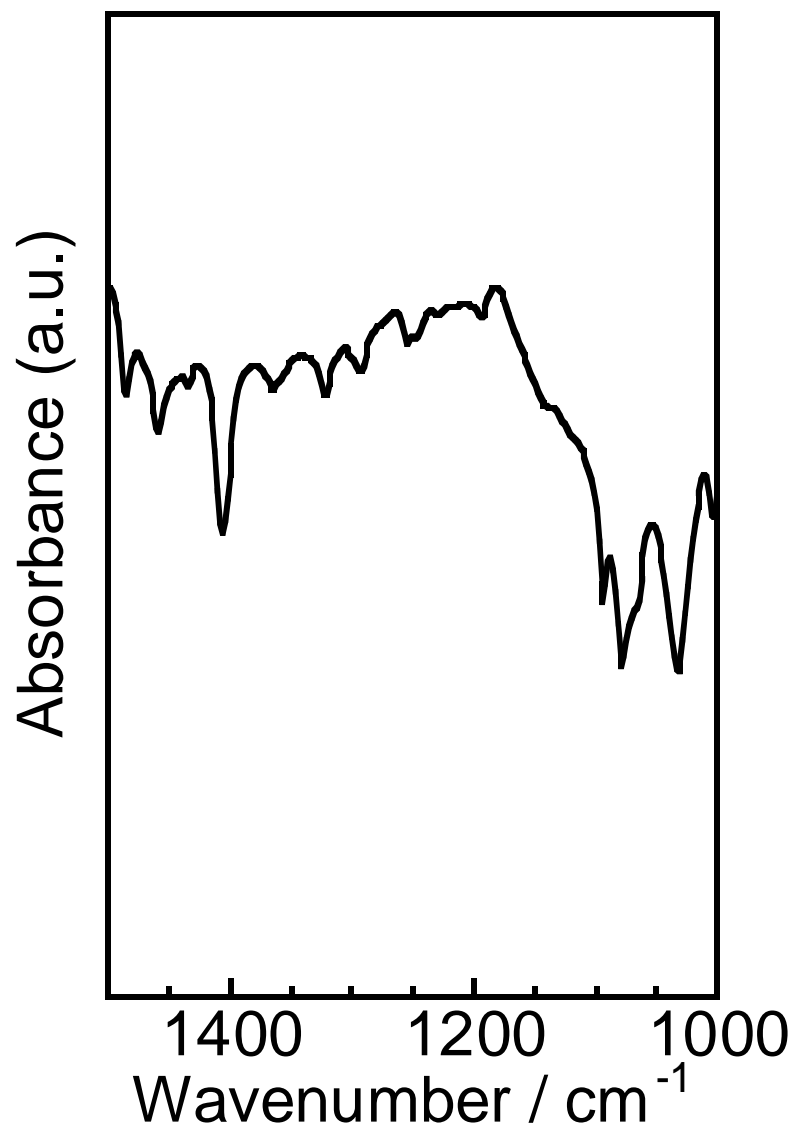

Fig. S1 FT-IR spectrum of TEOA-loaded TiO<sub>2</sub>.

Table S1 summary of various reduction of nitrobenzenes to anilines.

| Entry | reference  | Catal.                                                      | R      | Solvent          | Initial      | Irradiation                          | Hole scavenger                      | Temp.              | Atm.                     | Time / h | Conv. / %       | Sel. / %        |
|-------|------------|-------------------------------------------------------------|--------|------------------|--------------|--------------------------------------|-------------------------------------|--------------------|--------------------------|----------|-----------------|-----------------|
| 1     | 10         | AgNPs@CeO <sub>2</sub> , 25 mg                              | vinyl  | dodecane         | 0.5 mmol     | ×                                    | ×                                   | 110                | H <sub>2</sub> (6 atm)   | 6        | 99 <sup>a</sup> | 99              |
| 2     | 11         | Au/Al-2.5, 0.2 mol%                                         | vinyl  | THF              | 2 mmol       | ×                                    | ×                                   | 120                | H <sub>2</sub> (3 MPa)   | 2        | 100             | 99              |
| 3     | 11         | Au/Al-2.5, 0.2 mol%                                         | Acetyl | THF              | 2 mmol       | ×                                    | ×                                   | 65                 | H <sub>2</sub> (3 MPa)   | 4        | 100             | 99              |
| 4     | 9          | Au/TiO <sub>2</sub> , 0.23 × 10 <sup>2</sup> . <sup>b</sup> | Vinyl  | Toluene          | <sup>b</sup> | ×                                    | ×                                   | 120                | H <sub>2</sub> (15 bar)  | 6.5      | 98.5            | 95.9            |
| 5     | 9          | Pt/TiO <sub>2</sub> , 0.75 × 10 <sup>2</sup> . <sup>b</sup> | Chloro | THF              | <sup>b</sup> | ×                                    | ×                                   | 45                 | H <sub>2</sub> (4 bar)   | 1        | 99              | 99.6            |
| 6     | 9          | Pt/TiO <sub>2</sub> , 0.24 × 10 <sup>2</sup> . <sup>b</sup> | Acetyl | Toluene          | <sup>b</sup> | ×                                    | ×                                   | 40                 | H <sub>2</sub> (3 bar)   | 5.6      | 98.9            | 90.1            |
| 7     | 2          | TiO <sub>2</sub> , 50 mg                                    | vinyl  | Water            | 50 μmol      | Hg lamp (> 300 nm)                   | Oxalic acid, 200 μmol               | 25                 | Ar (1 atm)               | 6        | >99             | 88              |
| 8     | 2          | TiO <sub>2</sub> , 50 mg                                    | Chloro | Water            | 50 μmol      | Hg lamp (> 300 nm)                   | Oxalic acid, 200 μmol               | 25                 | Ar (1 atm)               | 2        | >99             | >99             |
| 9     | 2          | TiO <sub>2</sub> , 50 mg                                    | Bromo  | Water            | 50 μmol      | Hg lamp (> 300 nm)                   | Oxalic acid, 200 μmol               | 25                 | Ar (1 atm)               | 2        | >99             | >99             |
| 10    | 2          | TiO <sub>2</sub> , 50 mg                                    | Acetyl | Water            | 50 μmol      | Hg lamp (> 300 nm)                   | Oxalic acid, 200 μmol               | 25                 | Ar (1 atm)               | 2        | >99             | 91              |
| 11    | I          | CdS/g-C <sub>3</sub> N <sub>4</sub> , 0.1 g                 | H      | Benzotrifluoride | 127.5 μmol   | 300 W Xe lamp (> 420 nm)             | p-Methoxybenzyl alcohol, 382.5 μmol | 60                 | N <sub>2</sub> (0.5 MPa) | 4        | 70              | 57.1            |
| 12    | 34         | DHN/1 wt%Pt-TiO <sub>2</sub> , 50 mg                        | H      | Acetonitrile     | 0.1 mmol     | 500 W Xe lamp (> 420 nm)             | TEOA, 1 mmol                        | R. T. <sup>c</sup> | Ar (1 atm)               | 4        | 42.7            | ca. 75          |
| 13    | II         | Fe(bpy) <sub>3</sub> @rGO, 25 mg                            | Chloro | Acetonitrile     | 0.1 mmol     | 20 W LED (> 400 nm)                  | hydrazine monohydrate 1 mmol        | R. T. <sup>c</sup> | 1 atm <sup>c</sup>       | 10       | 86              | 97 <sup>d</sup> |
| 14    | II         | Fe(bpy) <sub>3</sub> @rGO, 25 mg                            | Bromo  | Acetonitrile     | 0.1 mmol     | 20 W LED (> 400 nm)                  | hydrazine monohydrate 1 mmol        | R. T. <sup>c</sup> | 1 atm <sup>c</sup>       | 12       | 80              | 94 <sup>d</sup> |
| 15    | III        | CdS, 20 mg                                                  | Chloro | <i>i</i> -PrOH   | 50 μmol      | 3 W Blue LED (> 420 nm)              | <i>i</i> -PrOH, solvent             | R. T. <sup>c</sup> | Ar (1 atm)               | 20       | 100             | 90              |
| 16    | III        | CdS, 20 mg                                                  | Acetyl | <i>i</i> -PrOH   | 50 μmol      | 3 W Blue LED (> 420 nm)              | <i>i</i> -PrOH, solvent             | R. T. <sup>c</sup> | Ar (1 atm)               | 20       | 100             | 98              |
| 17    | This study | DHN/TiO <sub>2</sub> , 50 mg                                | Vinyl  | Acetonitrile     | 50 μmol      | Blue LED (λ <sub>max</sub> = 467 nm) | TEOA, 300 μmol                      | R. T.              | Ar (1 atm)               | 10       | >99             | 97              |
| 18    | This study | DHN/TiO <sub>2</sub> , 50 mg                                | Chloro | Acetonitrile     | 50 μmol      | Blue LED (λ <sub>max</sub> = 467 nm) | TEOA, 300 μmol                      | R. T.              | Ar (1 atm)               | 10       | >99             | 98              |
| 19    | This study | DHN/TiO <sub>2</sub> , 50 mg                                | Bromo  | Acetonitrile     | 50 μmol      | Blue LED (λ <sub>max</sub> = 467 nm) | TEOA, 300 μmol                      | R. T.              | Ar (1 atm)               | 18       | >99             | >99             |
| 20    | This study | DHN/TiO <sub>2</sub> , 50 mg                                | Acetyl | Acetonitrile     | 50 μmol      | Blue LED (λ <sub>max</sub> = 467 nm) | TEOA, 300 μmol                      | R. T.              | Ar (1 atm)               | 15       | >99             | >99             |

<sup>a</sup> Conv. = (Yield / Sel.) × 100, <sup>b</sup> Pt/nitro (mol), <sup>c</sup> No description, <sup>d</sup> Sel. = (Yield / Conv.) × 100, <sup>e</sup> Numbers in parentheses represent results in the presence of 50 mg of the HCO<sub>2</sub>NH<sub>4</sub>.

- I. D. Xia, X., Mengli, M. Sugang, F. Xianliang and C. Shifu, *Appl. Catal. B: Environmental*, 2014, **158**, 382-390.
- II. A. Kumar, P. Kumar, S. Paul and S.L. Jain, *Appl. Surf. Sci.*, 2016, **386**, 103-114.
- III. E. Parvin, K. Foad and Z. Zahra, *J. Photochem. Photobiol.*, 2014, **274**, 7-12.
